# Supplementary material for: EpiAge: a next-generation sequencing-based ELOVL2 epigenetic clock for biological age assessment in saliva and blood across health and disease
Source: publisher site journal article supplement (doi:10.18632/aging.206188), 2025-01-22
Supplement: Supplementary file [file aging-v17i1-206188-supplementary-material-SD1.pdf]

## SUPPLEMENTARY TABLES

**Supplementary Table 1. Regression analysis results for chronological age across various epigenetic clocks and CpG sites including confounder adjustments.**

| Model description                         | R <sup>2</sup> | Adj. R <sup>2</sup> | F-Stat | p(F-stat) | Age Coef | Std Err  | t-Value | p-Value | 95% CI Lower | 95% CI Upper | AIC          | BIC | Observations |
|-------------------------------------------|----------------|---------------------|--------|-----------|----------|----------|---------|---------|--------------|--------------|--------------|-----|--------------|
| cg16867657<br>(ELOVL2 site)               | 0.757          | 0.757               | 1801   | <0.0001   | 0.0047   | 4.50E-05 | 105.465 | <0.0001 | 0.005        | 0.005        | -17790-17730 |     | 4625         |
| cg21572722<br>(ELOVL2 site)               | 0.702          | 0.702               | 1362   | <0.0001   | 0.0025   | 3.04E-05 | 82.951  | <0.0001 | 0.002        | 0.003        | -21430-21370 |     | 4625         |
| cg24724428<br>(ELOVL2 site)               | 0.626          | 0.625               | 965.1  | <0.0001   | 0.0039   | 4.87E-05 | 79.2    | <0.0001 | 0.004        | 0.004        | -17060-17010 |     | 4625         |
| EpiAgePublicBlood<br>DNAmAge<br>(Horvath) | 0.779          | 0.778               | 2030   | <0.0001   | 0.7612   | 0.007    | 111.887 | <0.0001 | 0.748        | 0.775        | 28630 28690  |     | 4625         |
| DNAmAge Hannum                            | 0.883          | 0.883               | 4357   | <0.0001   | 0.8554   | 0.006    | 153.678 | <0.0001 | 0.845        | 0.866        | 26780 26830  |     | 4625         |
| DNAmPhenoAge                              | 0.787          | 0.786               | 2127   | <0.0001   | 0.8966   | 0.008    | 116.929 | <0.0001 | 0.882        | 0.912        | 29740 29800  |     | 4625         |
| DNAmAgeSkinBlood<br>dClock                | 0.898          | 0.898               | 5078   | <0.0001   | 0.8855   | 0.005    | 184.542 | <0.0001 | 0.876        | 0.895        | 25400 25460  |     | 4625         |
| DNA GrimAge v1                            | 0.806          | 0.806               | 2395   | <0.0001   | 0.689    | 0.006    | 121.39  | <0.0001 | 0.678        | 0.7          | 26960 27010  |     | 4625         |
| DNA GrimAge v2                            | 0.765          | 0.765               | 1882   | <0.0001   | 0.6501   | 0.006    | 108.32  | <0.0001 | 0.638        | 0.662        | 27470 27530  |     | 4625         |

**Supplementary Table 2. Summary table for replicates.**

| ID | Mean  | SD   | CV (%) | 95% CI         | Minimum | Maximum | Median | 25th Percentile | 75th Percentile |
|----|-------|------|--------|----------------|---------|---------|--------|-----------------|-----------------|
| 1  | 67.3  | 1.34 | 1.99%  | [65.17, 69.43] | 66.09   | 68.72   | 67.2   | 66.13           | 68.58           |
| 2  | 90.67 | 0.99 | 1.09%  | [89.10, 92.24] | 89.38   | 91.77   | 90.77  | 89.7            | 91.55           |
| 3  | 63.47 | 1.56 | 2.46%  | [60.99, 65.95] | 61.65   | 65.33   | 63.44  | 61.97           | 64.99           |
| 4  | 80.19 | 1.04 | 1.29%  | [78.54, 81.84] | 79.51   | 81.72   | 79.76  | 79.54           | 81.26           |
| 5  | 72.89 | 1.6  | 2.19%  | [70.35, 75.43] | 71.5    | 74.44   | 72.8   | 71.5            | 74.35           |
| 6  | 72.61 | 4.43 | 6.10%  | [65.56, 79.67] | 66.57   | 76.47   | 73.71  | 67.96           | 76.18           |
| 7  | 83.37 | 1.25 | 1.50%  | [81.38, 85.36] | 82.04   | 84.84   | 83.3   | 82.2            | 84.61           |
| 8  | 86.78 | 2.04 | 2.35%  | [83.54, 90.03] | 84.93   | 89.21   | 86.49  | 85.02           | 88.83           |
| 9  | 66.6  | 0.98 | 1.48%  | [65.03, 68.16] | 65.58   | 67.73   | 66.54  | 65.68           | 67.57           |
| 10 | 74.35 | 2.6  | 3.49%  | [70.22, 78.48] | 71.28   | 77.41   | 74.36  | 71.84           | 76.85           |
| 11 | 78    | 1.01 | 1.29%  | [76.40, 79.60] | 76.91   | 79.11   | 78     | 77.04           | 78.97           |
| 12 | 79.25 | 1.65 | 2.08%  | [76.62, 81.87] | 77.56   | 81.29   | 79.07  | 77.75           | 80.92           |
| 13 | 87.51 | 0.85 | 0.98%  | [86.15, 88.87] | 86.59   | 88.64   | 87.41  | 86.76           | 88.37           |
| 14 | 62.81 | 1.24 | 1.98%  | [60.83, 64.79] | 61.1    | 63.94   | 63.1   | 61.51           | 63.82           |
| 15 | 81.45 | 1.52 | 1.86%  | [79.03, 83.86] | 79.65   | 83.28   | 81.43  | 80              | 82.91           |
| 16 | 82.22 | 1.88 | 2.29%  | [79.23, 85.21] | 79.59   | 84.02   | 82.62  | 80.29           | 83.74           |
| 17 | 82.62 | 1.47 | 1.78%  | [80.28, 84.96] | 81.62   | 84.81   | 82.03  | 81.72           | 84.11           |
| 18 | 70.94 | 1.8  | 2.54%  | [68.07, 73.81] | 69.39   | 73.07   | 70.64  | 69.42           | 72.75           |
| 19 | 77.23 | 1.14 | 1.48%  | [75.41, 79.05] | 75.67   | 78.25   | 77.5   | 76.03           | 78.16           |
| 20 | 87.44 | 2.78 | 3.18%  | [83.02, 91.86] | 84.12   | 90.63   | 87.5   | 84.72           | 90.09           |
| 21 | 72.08 | 0.79 | 1.09%  | [70.83, 73.33] | 71.4    | 73.21   | 71.85  | 71.51           | 72.87           |
| 22 | 77.4  | 0.67 | 0.87%  | [76.33, 78.47] | 76.86   | 78.35   | 77.19  | 76.9            | 78.11           |
| 23 | 88.47 | 2.45 | 2.77%  | [84.57, 92.37] | 86.01   | 91.31   | 88.28  | 86.23           | 90.9            |
| 24 | 66.71 | 1.58 | 2.37%  | [64.19, 69.22] | 65.26   | 68.7    | 66.44  | 65.36           | 68.34           |
| 25 | 70.23 | 2.79 | 3.98%  | [65.78, 74.67] | 67.92   | 73.78   | 69.61  | 67.96           | 73.12           |
| 26 | 68.85 | 1.19 | 1.73%  | [66.95, 70.74] | 67.78   | 70.23   | 68.69  | 67.82           | 70.03           |
| 27 | 78.66 | 2.4  | 3.05%  | [74.85, 82.48] | 75.61   | 81.41   | 78.81  | 76.31           | 80.86           |
| 28 | 80.28 | 0.76 | 0.94%  | [79.08, 81.49] | 79.59   | 81.14   | 80.2   | 79.62           | 81.03           |

|    |       |      |       |                |       |       |       |       |       |
|----|-------|------|-------|----------------|-------|-------|-------|-------|-------|
| 29 | 64.02 | 1.97 | 3.08% | [60.88, 67.15] | 62.06 | 66.69 | 63.66 | 62.35 | 66.05 |
| 30 | 76.23 | 1.19 | 1.56% | [74.35, 78.12] | 75.15 | 77.8  | 75.99 | 75.24 | 77.47 |
| 31 | 65.66 | 1.76 | 2.68% | [62.86, 68.46] | 64.11 | 67.2  | 65.66 | 64.12 | 67.19 |
| 32 | 70.15 | 1.95 | 2.78% | [67.05, 73.25] | 68.06 | 72.41 | 70.07 | 68.32 | 72.07 |
| 33 | 69.16 | 0.82 | 1.19% | [67.85, 70.47] | 67.97 | 69.79 | 69.44 | 68.29 | 69.75 |
| 34 | 66.46 | 2.03 | 3.05% | [63.24, 69.69] | 64.71 | 69.29 | 65.93 | 64.87 | 68.59 |
| 35 | 68.06 | 0.72 | 1.06% | [66.92, 69.20] | 67.25 | 68.72 | 68.13 | 67.36 | 68.69 |
| 36 | 81.62 | 1.52 | 1.86% | [79.20, 84.03] | 80.2  | 83.75 | 81.26 | 80.42 | 83.18 |
| 37 | 74.34 | 1.66 | 2.24% | [71.69, 76.98] | 72.53 | 75.93 | 74.44 | 72.73 | 75.84 |
| 38 | 66.67 | 1.71 | 2.57% | [63.95, 69.39] | 64.57 | 68.56 | 66.77 | 64.96 | 68.27 |
| 39 | 72.9  | 0.42 | 0.57% | [72.24, 73.56] | 72.47 | 73.41 | 72.85 | 72.52 | 73.32 |
| 40 | 68.86 | 2.32 | 3.37% | [65.16, 72.55] | 66.68 | 72.11 | 68.32 | 67    | 71.26 |
| 41 | 67.18 | 1.25 | 1.86% | [65.19, 69.17] | 65.78 | 68.63 | 67.15 | 65.98 | 68.4  |
